# Supplementary material for: Rainfall intensity estimations based on degradation characteristics of images taken with commercial cameras
Source: Copernicus journal article supplement (doi:10.5194/hess-29-3165-2025), 2025-07-24
Supplement: Supplementary file [file hess-29-3165-2025-supplement-title-page.pdf › hess-29-3165-2025-supplement-title-page.pdf]

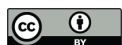

## *Supplement of*

# **Rainfall intensity estimations based on degradation characteristics of images taken with commercial cameras**

**Akito Kanazawa and Taro Uchida**

*Correspondence to:* Akito Kanazawa ([kanazawa.akito@gmail.com](mailto:kanazawa.akito@gmail.com))

- [hess-29-3165-2025-supplement-title-page.pdf](#)
- [Fig\\_S1.PNG](#)
- [Fig\\_S2.PNG](#)
- [Fig\\_S3.PNG](#)
- [Fig\\_S4.PNG](#)
- [Fig\\_S5.PNG](#)
- [Fig\\_S6.PNG](#)
- [Fig\\_S7.PNG](#)
- [Fig\\_S8.PNG](#)
- [Fig\\_S9.PNG](#)

The copyright of individual parts of the supplement might differ from the article licence.
